# Supplementary material for: Multidrug-Resistant Escherichia coli Isolate of Chinese Bovine Origin Carrying the blaCTX-M-55 Gene Located in IS26-Mediated Composite Translocatable Units
Source: MDPI journal article supplement (doi:10.3390/microorganisms11112795), 2023-11-17
Supplement: s1 [file s1]

**Table S1. Primers for strain identification and detecting the circular intermediate form.**

| Primers                       | Sequence (5'-3')                                              | Product length |
|-------------------------------|---------------------------------------------------------------|----------------|
| 16s                           | F:GAGCGGATAACAATTTACACAGG<br>R: CGCCAGGGTTTTCCCAGTCACGAC      | 500bp          |
| <i>bla</i> <sub>CTX-M-1</sub> | F: AACCGTCACGCTGTTGTTAG<br>R: TTGAGGCTGGGTGAAGTAAG            | 766bp          |
| XJ6-1-I                       | P1: CGTTTTTGCTCTCTTACGGTTGCG<br>P2: GCGTTGAGAATGGGAGAGACTGAGC | 3867bp         |
| XJ6-1-II                      | P1: AAGGAAGGACCCTGTGTCTCAACTC<br>P2: CGCCTGGCAACTGTGAAAGC     | 3818bp         |
| XJ6-1-III                     | P1: CATTATCACAGCGGA ACTCA<br>P2: AAAGTACTGTCTTTGTATCACTCT     | 3221bp         |
| XJ6-1-IV                      | P1: AGCCAACTGCTGCTGCGT<br>P2: GCTCAAAGAAATTGTATTCATAGGT       | 1739bp         |
| XJ6-1-V                       | P1: TTGTTATGACTGTTTTTTTGGGGT<br>P2: ATAAGTTCAGGCTCCAGTACCG    | 3422bp         |
| XJ55-I                        | P1: CTTATGCAACATCGTATTATTCTCC<br>P2: GATTTAACAGATTCGGTTCGCT   | 2762bp         |
| XJ55-II                       | P1: GCAAGGTTTCGGTCTCCA<br>P2: GGCTCGCTTCTGCTTTCAC             | 3349bp         |
| ZYB39-I                       | P1: TTCGCCTTACCCGCTTTTA<br>P2: ATTTAACAGATTCGGTTCGCTT         | 2844bp         |
| ZYB39-II                      | P1: ATGAAGTGGTTCGCATCCTCG<br>P2: TGGGCTCGCTTCTGCTTTC          | 3207bp         |
| ZYB62-I                       | P1: ATCAATGCCACACCCAGTCTGC<br>P2: CAACATCGTATTATTCTCCCCG      | 2616bp         |
| ZYB62-II                      | P1: CTCAAGTCCGATGACGAGGTAC<br>P2: CCGAACAGGCTTATGTCCACT       | 3095bp         |

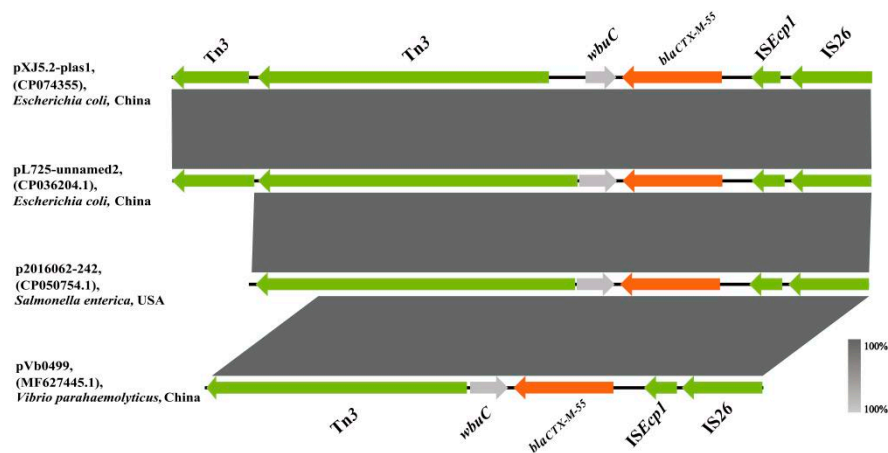

**Figure S1. Sequence alignment of *bla*<sub>CTX-M-55</sub>-positive IncHI2 plasmids of pXJ5.2-plas1.**
